# Supplementary material
Source: publisher site journal article supplement (https://www.dovepress.com/article/364803)
Supplement: Supplementary file 1 [file get_supplementary_file.php]

**Appendix 1 Measurement items for competitive classroom climate, upward comparison, downward comparison, and learning motivation Scales**

| Competitive Classroom Climate (α = 0.70) | |
| --- | --- |
| CCC1. | My teacher often compares my grades with others’ grades |
| CCC2. | The amount of recognition you get in this class depends on how your grades compared to other students. |
| CCC3. | Every student is concerned with finishing at the top of the class rankings. |
| CCC4. | My classmates frequently compare their grades with mine. |
| Upward Comparison (α = 0.84) | |
| UC1. | In presentations, I compare myself to other students who have performed better than me |
| UC2. | I compare myself to those students who appear to be more prepared in exam situations |
| UC3. | I like to compare with my classmates who perform better than me |
| UC4. | When writing practical reports, I compare myself to those students who seem more at ease than I am |
| UC5. | When things are going poorly for me in my degree, I think of other students I know who are doing better than me |
| UC6. | I evaluate my ability in producing coursework in relation to those students who appear to be better at it than myself |
| UC7. | I compare myself to those students who organize their time better efficiently  than myself |
| Downward Comparison (α = 0.95) | |
| DC1. | I compare myself to those students who I perceive as less able to produce coursework than I am |
| DC2. | I like to compare with my classmates who perform worse than me |
| DC3. | I compare myself to those students who seem less comfortable writing practical reports than me |
| DC4. | When I am feeling confident and happy with my degree, I compare myself to those students who are doing badly |
| DC5. | I compare myself to those students who organize their time less efficiently than myself |
| DC6. | I can’t help but compare myself to other students who appear to be weaker than me in group discussions |
| Learning Motivation (α = 0.78) | |
| LM1 | The more difficult the problem, the more I enjoy trying to solve it. |
| LM2 | I know my goals is to get better grades that other students. |
| LM3 | To me, success means doing better than other students. |
| LM4 | I am keenly aware of the grade goals I have for myself |
| LM5 | I enjoy learning new things |
| LM6 | It is important for me to be able to do what I most enjoy. |
| LM7 | I am strongly motivated by the recognition I can earn from other people. |
| LM8 | I enjoy trying to solve complex problems. |
| LM9 | I want other people to find out how good I really can be at my study |
| LM10 | What matters most to me is enjoying what I do |
